# Supplementary material for: Neutral network sizes of biological RNA molecules can be computed and are not atypically small
Source: PubMed Central journal article supplement (PMC2639431; doi:10.1186/1471-2105-9-464), 2008-10-30
Supplement: 1471-2105-9-464-S3.pdf [file 1471-2105-9-464-S3.pdf]

**Tables S1: The 82 biological RNA molecules used in this study.**

The biological RNAs with L=30 from the ncRNA data base.

| Id       | Organism                 | RNA type             | Sequence                       | Secondary structure          | Neutral set size      | Error                 |
|----------|--------------------------|----------------------|--------------------------------|------------------------------|-----------------------|-----------------------|
| AF357483 | Mus musculus             | snmRNA               | AAGCAAUUGUUUACUUACAGUCUGGAGAA  | ...(((((((.....)))))).)....  | $1.50 \times 10^{13}$ | $3.40 \times 10^{11}$ |
| AJ430257 | Archaeoglobus fulgidus   | snmRNA               | CAUCCGUUAGUAUGUGUAAGAAAGGGAGG  | ..(((.(.(.....)..).))..      | $5.76 \times 10^{11}$ | $4.75 \times 10^{10}$ |
| AJ505722 | Arabidopsis thaliana     | snmRNA               | CAGAAGAGCGGAUCCAAUACCAAGACUACU | .....((.....)).....          | $1.20 \times 10^{14}$ | $6.64 \times 10^{12}$ |
| Z71666   | Saccharomyces cerevisiae | snoRNA               | AGGCGUGUAACAUUUAUUGGUUACAACAUG | .(...(((((((.....)))))).)... | $1.72 \times 10^{11}$ | $2.61 \times 10^{10}$ |
| AB055777 | Homo sapiens             | Noncoding transcript | CUCUUUACCAAGGACCCGCCAACAUGGGC  | .((((.....)))...(((.....)))  | $8.65 \times 10^{12}$ | $1.36 \times 10^{11}$ |
| D28374   | Homo sapiens             | Noncoding transcript | CCUUUUGGCUCUCUGACCAGCACCAUGGCG | ((.....(((.....))).....)..   | $8.66 \times 10^{12}$ | $3.90 \times 10^{11}$ |
| AJ564940 | Homo sapiens             | Noncoding transcript | CGGAAAUCUGAAGGGAAAGUGGCAGGAAAG | .....(((.(.....)..))....     | $3.70 \times 10^{13}$ | $1.17 \times 10^{12}$ |
| X85345   | Homo sapiens             | Noncoding transcript | ACAUCUCAUAGGUGCCUCUGACUGAGUUGC | .(.(((((((.....)))..))))..)  | $1.95 \times 10^{12}$ | $2.46 \times 10^{10}$ |

**Tables S1: (cont.)**

The biological RNAs with L=33 from the ncRNA data base.

| id       | Organism               | RNA type             | Sequence                           | Secondary structure           | Neutral net size      | Error                 |
|----------|------------------------|----------------------|------------------------------------|-------------------------------|-----------------------|-----------------------|
| AF061109 | Moneuplotes crassus    | Telomerase RNA       | CCUCCAUAUAUCAAUUUGGGAAGGAUUGAAA    | .....((((((((.....)))))))).   | $8.54 \times 10^{15}$ | $4.84 \times 10^{13}$ |
| AJ430253 | Archaeoglobus fulgidus | snmRNA               | CAAACUUAACGAACGCUACGAGUUGAAAUCAGA  | .....((((.....)))).....       | $9.02 \times 10^{15}$ | $1.71 \times 10^{14}$ |
| S80603   | Trypanosoma cruzi      | gRNA                 | GAUAGAGAACGGAUGAGAAGGAUGUUUGUGAGA  | .....((((.....))))....        | $1.03 \times 10^{16}$ | $1.45 \times 10^{14}$ |
| AB017710 | Homo sapiens           | snoRNA               | UAAUCAAUGAUGAAACCUAUCCCGAAGCUGAUA  | .....(((.....))).....         | $2.92 \times 10^{16}$ | $5.28 \times 10^{14}$ |
| AB055770 | Homo sapiens           | Noncoding transcript | CUUUCUGGUCUCGGCCGCGAGAAGCGAGAUGACG | .....((((.....)))).           | $5.34 \times 10^{13}$ | $1.66 \times 10^{12}$ |
| AB056456 | Homo sapiens           | Noncoding transcript | CUCCUCUCUCCGGUCCGUGCCUCCAAGAUGACA  | ..(((.....))....)..           | $1.27 \times 10^{14}$ | $3.47 \times 10^{12}$ |
| D28386   | Homo sapiens           | Noncoding transcript | CUUCCUUCCAACUAGACGCGUCAGAAUGGCU    | .....(((.....))).             | $1.87 \times 10^{16}$ | $5.78 \times 10^{14}$ |
| S43366   | Homo sapiens           | Noncoding transcript | GCCUUGAAGGGAGGUUGUAGAAAACUGUAAGC   | ..(((.....))..((((.....)))))) | $1.43 \times 10^{14}$ | $1.28 \times 10^{12}$ |
| AJ309206 | Homo sapiens           | Noncoding transcript | CCCGAAACUCUGGAUCCGGGGCCCUUCACAGC   | ...(((.....))....)            | $1.45 \times 10^{14}$ | $3.03 \times 10^{12}$ |

**Tables S1: (cont.)**

The biological RNAs with L=35 from the ncRNA data base.

| id       | Organism                | RNA type             | Sequence                             | Secondary structure                | Neutral net size      | Error                 |
|----------|-------------------------|----------------------|--------------------------------------|------------------------------------|-----------------------|-----------------------|
| AF380696 | Leishmania tarentolae   | gRNA                 | AAACAAACAGUGCACGGGGUCGGAUGUAAACACA   | .....((((...((.....))))).).....    | $1.11 \times 10^{14}$ | $7.97 \times 10^{12}$ |
| AJ430256 | Archaeoglobus fulgidus  | snmRNA               | GCGAGAGUUUAGGCGGCUUGUAAGAAAGGGAGGCU  | ((((((.....)).....)).....)         | $2.28 \times 10^{16}$ | $4.36 \times 10^{14}$ |
| AJ544037 | Drosophila melanogaster | snmRNA               | GCCCGAAGAAGCCGAAAGCUUGGAUGGCUGGGAUG  | .((((.....((((.....)))).....)).... | $5.37 \times 10^{15}$ | $1.13 \times 10^{14}$ |
| AJ544038 | Drosophila melanogaster | snmRNA               | CAUUUGGAGAACGAAAGAAGACCAACAAGUGC GCG | ((((((.....(.....).....))))....    | $2.36 \times 10^{14}$ | $2.72 \times 10^{13}$ |
| L11652   | Trypanosoma brucei      | gRNA                 | CCAACAAACAGAAUAACUAGUGCACGGUGAUGAUG  | .....((..(((.....))))..))          | $1.95 \times 10^{15}$ | $7.98 \times 10^{13}$ |
| M11772   | Homo sapiens            | snRNA                | ACCCAAUUUUUUGAGGCCUUGCUUUGGCAAGGCUA  | .....((((((((.....))))))....       | $1.28 \times 10^{17}$ | $6.97 \times 10^{14}$ |
| AB055765 | Homo sapiens            | Noncoding transcript | CUUCUCCUUCUCGCCUAACGCUGCCAACAUGGUG   | .....((((.....))....               | $3.51 \times 10^{17}$ | $6.91 \times 10^{15}$ |
| D28349   | Homo sapiens            | Noncoding transcript | UUCUUUUUUUCUUUUUUCGGCGUUCAAGAUGUCG   | .....((((((((.....))))))....       | $9.73 \times 10^{16}$ | $8.58 \times 10^{14}$ |

**Tables S1: (cont.)**

The biological RNAs with L=40 from the ncRNA data base.

| Id       | Organism               | RNA type             | Sequence                                  | Secondary structure             | Neutral set size      | Error                 |
|----------|------------------------|----------------------|-------------------------------------------|---------------------------------|-----------------------|-----------------------|
| AF380736 | Leishmania tarentolae  | gRNA                 | AACCACACAGAGAACAUUUACACGUAGAAUGCAACAUUG   | .....(((.....))).....           | $1.82 \times 10^{19}$ | $5.08 \times 10^{17}$ |
| AJ430248 | Archaeoglobus fulgidus | snmRNA               | GCCGAAUCGAUCAGAAGAGAACUGACAAGUUGAAAUCAGA  | .....((((.....))).....)         | $1.12 \times 10^{18}$ | $2.54 \times 10^{16}$ |
| AJ430294 | Archaeoglobus fulgidus | snmRNA               | CAACGUCGCAACAAGAGUGUUUUACCGUGAUAACGUGA    | ...(((.....))).....(((.....))). | $4.45 \times 10^{15}$ | $7.52 \times 10^{14}$ |
| L25589   | Trypanosoma brucei     | gRNA                 | GACACAAUGAAGAAAUGCACUCUAAAAUGCACAGUGAUUA  | .....(((.....))).....           | $1.17 \times 10^{20}$ | $3.74 \times 10^{18}$ |
| L25590   | Trypanosoma brucei     | gRNA                 | UAAAAGACAAUGUAGAUUUUCUGAGUAAUAGGGAGGAUAAC | .....(((.....))).....           | $9.13 \times 10^{17}$ | $3.30 \times 10^{16}$ |
| D28454   | Homo sapiens           | Noncoding transcript | CUUUCGCGCGGUGACGACCUACGCACACGAGAACAUGCCU  | .....(((.....))).....           | $9.19 \times 10^{15}$ | $7.08 \times 10^{14}$ |
| X99684   | Homo sapiens           | Noncoding transcript | CAGGCCGUCUGUCCUCCUGCUCCUACCCACCUAGUGUCAAG | ..(((.....))).....              | $7.28 \times 10^{17}$ | $6.05 \times 10^{16}$ |

**Tables S1: (cont.)**

The biological RNAs with L=43 from the ncRNA data base.

| id       | Organism                | RNA type       | Sequence                                    | Secondary structure                    | Neutral set size      | Error                 |
|----------|-------------------------|----------------|---------------------------------------------|----------------------------------------|-----------------------|-----------------------|
| AF036740 | Schistosoma mansoni     | Ribozyme       | AUCCAGCUCACGAGUCCCAAUAGGACGAAACGCGUCCUCAU   | .....(((.....)).....((((.....))))..... | $5.84 \times 10^{19}$ | $1.75 \times 10^{18}$ |
| X15621   | Schistosoma mansoni     | Ribozyme       | AUCCAGACGCGCGUUCGUCUUAUUUGGACUCGUCAGCUGGAU  | (((((((.....)))).....)))).....         | $2.19 \times 10^{18}$ | $5.06 \times 10^{16}$ |
| AF380675 | Leishmania tarentolae   | gRNA           | AAUACGCAUAAUACUAGAUCGUGAAUAGAAGAGAUAGAUUU   | .....(((.....)).....)                  | $1.34 \times 10^{20}$ | $6.96 \times 10^{18}$ |
| AF380679 | Leishmania tarentolae   | gRNA           | ACUCCUGGCAGAUAAUAGAACUAUCACUCUCGGUUGUAGACA  | .....(((.....)).....)                  | $9.38 \times 10^{20}$ | $2.92 \times 10^{19}$ |
| AF380717 | Leishmania tarentolae   | gRNA           | UUUAUGCUUGACAGACUAACAAUACUACUUUAACUAGAGACG  | .....(((.....)).....)                  | $6.29 \times 10^{21}$ | $1.75 \times 10^{20}$ |
| AF380724 | Leishmania tarentolae   | gRNA           | ACUCCUGGCAAGUCAAUAGAAUUAUCGUCUCCGAUUAUAGAU  | ..(((.....)).....)                     | $1.19 \times 10^{19}$ | $4.64 \times 10^{17}$ |
| AJ430285 | Archaeoglobus fulgidus  | snmRNA         | GCGGGAUCUGCAUUGUUUCACCCAGAGGAGGCUUACGCCUCCU | ..(((.....)).....)                     | $9.34 \times 10^{16}$ | $5.85 \times 10^{15}$ |
| AJ544018 | Drosophila melanogaster | snoRNA         | GCUUCACCCAGAGCAGGGCAGUGAAAAUUGUCAAGCACAAAU  | (((.....)).....)                       | $2.09 \times 10^{18}$ | $1.56 \times 10^{17}$ |
| AJ544036 | Drosophila melanogaster | snmRNA         | GCGGCGGCGGCCGUUCAACAUGUGUUGUUUAACUUUGUGGCA  | ..(((.....)).....)                     | $1.16 \times 10^{18}$ | $2.60 \times 10^{16}$ |
| S80581   | Trypanosoma cruzi       | gRNA           | AAACAAAACAUAAGAUAAGGUGAAGUGAAUAUUGAGAGAUUUG | ...(((.....)).....)                    | $9.98 \times 10^{19}$ | $7.23 \times 10^{18}$ |
| U12393   | Trypanosoma brucei      | gRNA           | AUAUAAGUACAAACAGACAGUGAGAAGAUACGAGACUGAGUA  | .....(((.....)).....)                  | $1.24 \times 10^{21}$ | $5.01 \times 10^{19}$ |
| D28352   | Homo sapiens            | Nc. transcript | CUUUUCCGGUGUGGAGUCUGGAGACGACGUGCAGAAAUGGCA  | (((((.....)).....)))..                 | $8.98 \times 10^{16}$ | $5.70 \times 10^{15}$ |

**Tables S1: (cont.)**

The biological RNAs with L=50 from the ncRNA data base.

| id       | Organism              | RNA type | Sequence                                           | Secondary structure                   | Neutral net size      | Error                 |
|----------|-----------------------|----------|----------------------------------------------------|---------------------------------------|-----------------------|-----------------------|
| AJ248286 | Pyrococcus abyssi GE5 | snRNA    | UAUGAUGAGAGAGCUGUAAAUGAUUGAUGAUUAGAGGAUGGCUGGCUGA  | .....((..(((((((.....)))))).....))..) | $6.37 \times 10^{21}$ | $1.67 \times 10^{20}$ |
| AJ248285 | Pyrococcus abyssi GE5 | snRNA    | AAUGAUGAAAUCGGUCUUGUCCGAGGAGUGAUGAUAGUGGUCACCGCUGA | .....(((.....))..(((.....)))..)       | $6.57 \times 10^{22}$ | $1.40 \times 10^{21}$ |
| AJ248283 | Pyrococcus abyssi GE5 | snRNA    | AAUGAUGAGACCGGCACUAACUGAGUUGUGAUGAGCACUCGGUUGGCUGA | .....(((((((.....)))))).....)         | $1.16 \times 10^{21}$ | $3.33 \times 10^{19}$ |
| AJ248287 | Pyrococcus abyssi GE5 | snRNA    | GAUGAUGAGGCCUAACUCGUCGAGCUGUGAUGAGUGGGUGAGCUGGCUGA | .....(((.....(((.....))))))..)        | $1.82 \times 10^{22}$ | $5.39 \times 10^{20}$ |
| AF254841 | Pyrococcus abyssi GE5 | snoRNA   | GAUGAUGAGCGCCAUCGAUGCUGAGGAGUGAUGACCGGAUUCUGGCUGA  | ..((((.....))..(((.....)))).....      | $9.17 \times 10^{21}$ | $1.94 \times 10^{20}$ |
| AF254842 | Pyrococcus abyssi GE5 | snoRNA   | GAUGAUGAGCGUUUACCGGUCUGAGCUGUGAUGACAUCGGCACUGUCUGA | ..((((.....(((.....)))))).....)       | $2.93 \times 10^{22}$ | $7.66 \times 10^{20}$ |
| AJ248283 | Pyrococcus abyssi GE5 | snRNA    | AAUGAUGAGAUGGGCGGAUUGCUGAGCUGUGAUGAAGACCUAGGGUCUGA | .....((.....))..(((.....)))..)        | $3.07 \times 10^{22}$ | $1.15 \times 10^{21}$ |
| AJ248283 | Pyrococcus abyssi GE5 | snRNA    | GAUGAGGAAGCCGAGGACACUGAAUUGUGAUGAAUUCUUCGCUUCGCCGA | .....(((((((.....)))))).....)         | $4.49 \times 10^{21}$ | $1.26 \times 10^{20}$ |
| AJ248283 | Pyrococcus abyssi GE5 | snRNA    | UCAGGUGAUGCGGACUUCACACCACUCAGCCGGUUGAUCCAUCAUCAUC  | ..(((((((.....)))))).....)            | $6.62 \times 10^{19}$ | $2.51 \times 10^{18}$ |
| AJ248283 | Pyrococcus abyssi GE5 | snRNA    | UCAGCCAGAUUGCCUUCACACCCUUCAGCAACAAGCGAGUUCAUCAUC   | ...((.....))..(((.....)))..)          | $1.50 \times 10^{22}$ | $1.34 \times 10^{21}$ |
| AJ248284 | Pyrococcus abyssi GE5 | snoRNA   | UCAGCUAAUACCGACAUCAUACCCUUCAGGCUGGGCAAGGCUCGUCUUC  | .....((((.....)))).....               | $5.55 \times 10^{23}$ | $1.62 \times 10^{22}$ |
| AJ248284 | Pyrococcus abyssi GE5 | snRNA    | UCAGCCCAUGCGAGUUUCUACCCUUCGCGCCAAAUCUUCUUCAUCAUC   | ((.....)).....                        | $2.63 \times 10^{21}$ | $3.03 \times 10^{20}$ |
| AJ248284 | Pyrococcus abyssi GE5 | snRNA    | GAUGAUUGGAAACGGAGUGAGCUGAGGUGUGAUGACCGACUUCGCGUGA  | ....(((.....)).....(((.....))))..)    | $6.96 \times 10^{20}$ | $3.36 \times 10^{19}$ |
| AJ248284 | Pyrococcus abyssi GE5 | snRNA    | UCAGUUGCGAGGGUACUUCACUUUCAGCUAGCGAAAUUUCUUCUUCUUC  | ..(((((((.....)))))).....)            | $5.82 \times 10^{21}$ | $1.24 \times 10^{20}$ |
| AJ248285 | Pyrococcus abyssi GE5 | snRNA    | GAUGAGGAGUUCAGCCUAGGCUGAGGCGUGAUGAGGGAGUGACGGACUGA | .....((((.....))))..(((.....))).....  | $3.72 \times 10^{22}$ | $1.43 \times 10^{21}$ |
| AJ248286 | Pyrococcus abyssi GE5 | snRNA    | UCAGGGGGUGUUCACCUCAUCAUAGGUCAGGUGGCUUCUUCUUCUUCUUC | ..(((((((.....)))))).....)            | $2.28 \times 10^{21}$ | $7.06 \times 10^{19}$ |
| AJ248287 | Pyrococcus abyssi GE5 | snRNA    | UCAGGAAGCCGUCCACUCCUACCCUUCAGGUGCGGAAGGCUUCAUCAUU  | ....((((.....(((.....)))))).....)     | $1.41 \times 10^{22}$ | $4.01 \times 10^{20}$ |
| AJ248287 | Pyrococcus abyssi GE5 | snRNA    | GAUGAGGAGAGGGUAGGUAGCUGAGUUAUGAUGAACUAAUCGGCCCCCGA | .....(((.....(((.....))))))..)        | $1.11 \times 10^{22}$ | $6.90 \times 10^{20}$ |
| AJ248287 | Pyrococcus abyssi GE5 | snRNA    | UCAGAACCACGAGACAUCACACUUCAGCCAAGGGUGGGAUCAUCCUC    | .....((((.....)))).....               | $2.24 \times 10^{25}$ | $5.21 \times 10^{23}$ |
| AF357428 | Mus musculus          | snoRNA   | GAUCUGAUGGGGNCUGAGUGUUUCUGNUGACAUGAACAGAUUCUGAGG   | ..(((((((.....)))))).....)            | $5.16 \times 10^{20}$ | $2.11 \times 10^{19}$ |
| AF357500 | Mus musculus          | snmRNA   | CAGGAAGAGAUGAAAUUCUAAAGAGAGGUCCUCAGAAAUCAAAAGAAGA  | .....(((.....(((.....)))))).....      | $1.62 \times 10^{22}$ | $6.55 \times 10^{20}$ |

**Tables S1: (cont.)**

The biological RNAs with L=50 from the ncRNA data base (cont.)

|          |                        |                      |                                                     |                                                  |                       |                       |
|----------|------------------------|----------------------|-----------------------------------------------------|--------------------------------------------------|-----------------------|-----------------------|
| AF380713 | Leishmania tarentolae  | gRNA                 | UAAAACAUCAAACAAAAAGUUGAGUCACAGAUAAAUGAGAGACACGUUAG  | ...(((.....(((.....)))..(((.....))..)))..))..    | $5.55 \times 10^{19}$ | $5.12 \times 10^{18}$ |
| AF380749 | Leishmania tarentolae  | gRNA                 | AUACAAACGGCGAUAAUAUAUUAGACAUAGCGGAAAUAAGAUAAUUAUA   | .....((.....(((.....))).....).).....             | $3.65 \times 10^{21}$ | $1.11 \times 10^{21}$ |
| M10126   | Leishmania tarentolae  | gRNA                 | ACAUAUGACUUGAAGUAAAAAGAUAAUAUAAUUUUUAAAUAUAACUUA    | .....(((((((((((.....)))))).....))))).           | $1.66 \times 10^{23}$ | $2.85 \times 10^{21}$ |
| X60509   | Leishmania tarentolae  | gRNA                 | GUUAAAACUUAACUCGGUUAUAAAUAUAGGGAACAUUUGAGAGUCGUUAU  | (((.....))).....((((.....))).....)               | $4.87 \times 10^{21}$ | $2.84 \times 10^{20}$ |
| AJ430259 | Archaeoglobus fulgidus | snmRNA               | UGGUGACUUGGCAACCAUCUUGUAAGAAAGGGAGGCCUCCGAAAAUGGAG  | .(.....).....((.....)).....((.....))             | $2.01 \times 10^{17}$ | $5.91 \times 10^{16}$ |
| L16537   | Trypanosoma brucei     | gRNA                 | UAUAAAUAACCACAUGAAUCUUAUAUGUACGAUGGAGAUGAGAAUUAUGC  | .....((((.....(((.....)).....))))).              | $1.81 \times 10^{22}$ | $9.16 \times 10^{20}$ |
| L16541   | Trypanosoma brucei     | gRNA                 | AUAUAAAACAAACAAACUAAUAAAUGUAAAUCUGAUGUGUGUAUAUCUAUG | .....((((.....(((.....)).....))))....            | $3.02 \times 10^{24}$ | $1.23 \times 10^{23}$ |
| L16543   | Trypanosoma brucei     | gRNA                 | AUAUAAACCAAAAAACUCGCGAUUUUGAUGUAAUAAUGACUGUGUAAAUUU | .....((((.....(((.....)).....)))).....           | $1.52 \times 10^{23}$ | $5.67 \times 10^{21}$ |
| M17439   | Tobacco ringspot virus | Ribozyme             | UACCAGGUAAUAUACCACAACGUGUGUUUCUCUGGUUGACUUCUCUGUUU  | .(.....((((.....)))).....)                       | $3.98 \times 10^{22}$ | $1.11 \times 10^{21}$ |
| S80611   | Trypanosoma cruzi      | gRNA                 | GGUGUAUAUGGUGACAAACUAUGAAAGGUAGAGUUGUGGAGUUGAUAGAA  | ..(((.....(((.....))).....)).....)               | $1.51 \times 10^{19}$ | $2.09 \times 10^{18}$ |
| U30216   | Crithidia fasciculata  | gRNA                 | UCUCUCCCUAUAUAAAAACAUAUAGGGAGAGAGUAAAGGUGCCCUAUA    | (((((((((((.....)))))).....)))).....((.....))... | $7.05 \times 10^{20}$ | $1.90 \times 10^{19}$ |
| U30217   | Crithidia fasciculata  | gRNA                 | GAGCCACGGUUCUAGAUCGAACCAUGUGUAUAGUACAGGCAUAACUAUUU  | ..(((.....))).....((.....)).....                 | $9.00 \times 10^{21}$ | $3.44 \times 10^{20}$ |
| AB055774 | Homo sapiens           | Noncoding transcript | CUCUUCUUAAGCCGGCGCUCGGCAAGUUCUCCAGGAGAAAGCCAUGUUC   | .....((((.....))).....((.....)).....             | $3.03 \times 10^{23}$ | $8.57 \times 10^{21}$ |
| AF082503 | Homo sapiens           | Noncoding transcript | CGACCAGCCGAAUCGCUCUCGAGCAGAGGCCGAUACAAAGCAGGGGAAA   | .....((((.....)))).....                          | $4.56 \times 10^{24}$ | $1.57 \times 10^{23}$ |
| AF279138 | Homo sapiens           | Noncoding transcript | CCCGCCAGAGACAGCUCAGGUGCAAGGAGAUGAGACUAUACAUCAGGCAG  | ..(((.....)).....((((.....))))..)                | $6.60 \times 10^{21}$ | $2.97 \times 10^{20}$ |
| S60300   | Homo sapiens           | Noncoding transcript | GGGUGUUUAUCCUCAUGGACUAAUUAAGGAACAGGACUGAACGUCUUGCU  | ((.....((((.....(((.....)).....)))).....)).....  | $1.50 \times 10^{21}$ | $7.44 \times 10^{19}$ |
| X58756   | Homo sapiens           | Noncoding transcript | UGGAAAACAAGCUGGUCUUUGGCGCAGGAACCAUUCUGAGAGUCAAGUCCU | ((.....).....((.....))).....((.....)).....)      | $6.40 \times 10^{19}$ | $4.08 \times 10^{18}$ |
